# Supplementary material
Source: Elsevier journal article supplement (https://researchonline.lshtm.ac.uk/2537075/1/mmc1.pdf)
Supplement: mmc1 [file mmc1.pdf]

# THE LANCET

## Diabetes & Endocrinology

### **Supplementary appendix**

This appendix formed part of the original submission and has been peer reviewed.  
We post it as supplied by the authors.

Supplement to: White J, Sofat R, Hemani G, et al, for the UCLEB (University College London-London School of Hygiene & Tropical Medicine-Edinburgh-Bristol Consortium). Plasma urate concentration and risk of coronary heart disease: a Mendelian randomisation analysis. *Lancet Diabetes Endocrinol* 2016; published online Jan 15. [http://dx.doi.org/10.1016/S2213-8587\(15\)00386-1](http://dx.doi.org/10.1016/S2213-8587(15)00386-1).

## **Supplementary Material**

### **Plasma urate and coronary heart disease: Mendelian randomisation analysis.**

Jon White§, Reecha Sofat, Gibran Hemani, Tina Shah, Jorgen Engmann, Caroline Dale, Sonia Shah, Felix A Kruger, Claudia Giambartolomei, Daniel I. Swerdlow, Tom Palmer, Stela McLachlan, Claudia Langenberg, Delilah Zabaneh, Ruth Lovering, Alana Cavadino, Barbara Jefferis, Chris Finan, Andrew Wong, Antoinette Amuzu, Ken Ong, Tom R. Gaunt, Helen Warren, Teri-Louise Davies, Fotios Drenos, Jackie Cooper, Shah Ebrahim, Debbie A. Lawlor, Philippa J. Talmud, Steve E. Humphries, Christine Power, Elina Hypponen, Marcus Richards, Rebecca Hardy, Diana Kuh, Nicholas Wareham, Yoav Ben-Shlomo, Ian N. Day, Peter Whincup, Richard Morris, Mark W. J. Strachan, Jacqueline Price, Meena Kumari, Mika Kivimaki, Vincent Plagnol, John C. Whittaker, International Consortium for Blood Pressure (ICBP)<sup>a</sup>, George Davey Smith, Frank Dudbridge, Juan P. Casas, Michael V. Holmes\*§, Aroon D. Hingorani\*, on behalf of the University College-London-School-Edinburgh-Bristol (UCLEB) Consortium.

\* Contributed equally

§ Corresponding authors

---

<sup>a</sup> See: Supplementary Appendix 1 for list of International Consortium for Blood Pressure (ICBP) authors.

## **Contents**

### **Supplementary Tables**

|                                                                                                       |     |
|-------------------------------------------------------------------------------------------------------|-----|
| Table S1. Sources of data for estimate of observational associations with plasma urate concentration. | 1   |
| Table S2. Sources of data used in this study.                                                         | 2   |
| Table S3. SNPs used to construct the genetic instrument for plasma urate.                             | 3   |
| Table S4. Association of the 31 SNP plasma urate instrument with cardiovascular traits.               | 4   |
| Table S5. Proxy SNPs used in the Instrument.                                                          | 4   |
| Table S6. Power (two-sided $\alpha=0.05$ ) for conventional IV regression of the binary outcomes.     | 4   |
| Table S7. Power ( $\alpha=0.05$ ) for conventional IV regression of the continuous outcomes.          | 5   |
| Table S8. Gene Ontology Enrichment Analysis.                                                          | 5   |
| Table S9. Function and druggability of genes represented in the genetic instrument for plasma urate.  | 6-9 |
| Table S10. Sensitivity tests with different covariate models.                                         | 10  |

### **Supplementary Figures**

|                                                                                                                                              |    |
|----------------------------------------------------------------------------------------------------------------------------------------------|----|
| Figure S1. The distribution of plasma urate concentration in the UCLEB consortium data.                                                      | 11 |
| Figure S2. Power curves derived from analytical outcomes.                                                                                    | 12 |
| Figure S3. Observational association between plasma urate concentration and relative risk of CHD in 17 prospective population-based cohorts. | 13 |
| Figure S4. The association of individual SNPs and the 31 SNP instrument for plasma urate concentration with continuous phenotypes.           | 14 |
| Figure S5. The association of individual SNPs and the 31 SNP instrument for plasma urate concentration with continuous phenotypes.           | 15 |
| Figure S6. The association of the individual SNPs and the 31 SNP instrument for plasma urate concentration with blood pressure               | 16 |
| Figure S7. The association of the individual SNPs and the 31 SNP instrument for plasma urate concentration with binary phenotypes.           | 16 |
| Figure S8. Funnel plot of individual IV beta estimates for SNPs in the instrument.                                                           | 17 |
| Figure S9. Sensitivity tests                                                                                                                 | 18 |
| Figure S10. Association of SNPs with plasma urate concentration and risk of CHD                                                              | 19 |

|                                                           |           |
|-----------------------------------------------------------|-----------|
| <b>Supplementary Appendix 1. Contributors to the ICBP</b> | <b>20</b> |
|-----------------------------------------------------------|-----------|

|                                 |              |
|---------------------------------|--------------|
| <b>Supplementary References</b> | <b>21-22</b> |
|---------------------------------|--------------|

Table S1. Sources of data for estimate of observational associations with plasma urate concentration.

| Data Source                          | SBP   | DBP  | TC    | TG    | HDL-C | LDL-C | Creatinine | BMI   | Glucose |
|--------------------------------------|-------|------|-------|-------|-------|-------|------------|-------|---------|
| Liese et al.1999. <sup>s1</sup>      | 1005  | 1005 | 1005  | -     | 1005  | -     | 1005       | 1005  | -       |
| Puddu et al. 2001. <sup>s2</sup>     | 2469  | -    | -     | -     | 2469  | -     | -          | 2469  | 2469    |
| Fang et al. 2000. <sup>s3</sup>      | 5926  | 5926 | 5926  | -     | -     | -     | -          | 5926  | -       |
| Medalie et al. 1973. <sup>s4</sup>   | 6411  | 6411 | 6411  | 6411  | -     | -     | -          | 6411  | 6411    |
| Moriarity et al. 2000. <sup>s5</sup> | 13504 | -    | -     | 13504 | 13504 | 13504 | -          | 13504 | -       |
| UCLEB consortium <sup>s6</sup>       | 5691  | 5691 | 5691  | 5691  | 5691  | 5691  | 5691       | 5691  | 5691    |
| Tomita et al.2000. <sup>s7</sup>     | 49413 | -    | 49413 | -     | -     | -     | -          | 49413 | -       |

*Note: Estimates reported for smoking, age, sex, eGFR and, diabetes were made in UCLEB consortium data only.*

Table S2. Sources of data used in this study.

| Association (A with B)           | Data                                                                                                                                                                  | N individuals          | N studies |
|----------------------------------|-----------------------------------------------------------------------------------------------------------------------------------------------------------------------|------------------------|-----------|
| <b>Observational Association</b> |                                                                                                                                                                       |                        |           |
| Urate – lipid phenotypes         | Leise <i>et al.</i> <sup>s1</sup>                                                                                                                                     | 1 005                  | 1         |
|                                  | Puddu <i>et al.</i> <sup>s2</sup>                                                                                                                                     | 2 469                  | 1         |
|                                  | Medalie <i>et al.</i> <sup>s4</sup>                                                                                                                                   | 6 411                  | 1         |
|                                  | Moriarty <i>et al.</i> <sup>s5</sup>                                                                                                                                  | 13 504                 | 1         |
|                                  | UCLEB <sup>s6</sup>                                                                                                                                                   | 5 691                  | 2*        |
| Urate – BMI                      | Leise <i>et al.</i> <sup>s1</sup>                                                                                                                                     | 1 005                  | 1         |
|                                  | Puddu <i>et al.</i> <sup>s2</sup>                                                                                                                                     | 2 469                  | 1         |
|                                  | Medalie <i>et al.</i> <sup>s4</sup>                                                                                                                                   | 6 411                  | 1         |
|                                  | Moriarty <i>et al.</i> <sup>s5</sup>                                                                                                                                  | 13 504                 | 1         |
|                                  | Fang <i>et al.</i> <sup>s3</sup>                                                                                                                                      | 5 926                  | 1         |
|                                  | Tomita <i>et al.</i> <sup>s7</sup>                                                                                                                                    | 49 413                 | 1         |
|                                  | UCLEB <sup>s6</sup>                                                                                                                                                   | 5 691                  | 3§        |
| Urate – T2D                      | UCLEB <sup>s6</sup>                                                                                                                                                   | 4394                   | 2*        |
| Urate – fasting glucose          | Leise <i>et al.</i> <sup>s1</sup>                                                                                                                                     | 1 005                  | 1         |
|                                  | Puddu <i>et al.</i> <sup>s2</sup>                                                                                                                                     | 2 469                  | 1         |
|                                  | Moriarty <i>et al.</i> <sup>s5</sup>                                                                                                                                  | 13 504                 | 1         |
|                                  | UCLEB <sup>s6</sup>                                                                                                                                                   | 5 691                  | 3§        |
| Urate - BP                       | Leise <i>et al.</i> <sup>s1</sup>                                                                                                                                     | 1 005                  | 1         |
|                                  | Puddu <i>et al.</i> <sup>s2</sup>                                                                                                                                     | 2 469                  | 1         |
|                                  | Medalie <i>et al.</i> <sup>s4</sup>                                                                                                                                   | 6 411                  | 1         |
|                                  | Moriarty <i>et al.</i> <sup>s5</sup>                                                                                                                                  | 13 504                 | 1         |
|                                  | Fang <i>et al.</i> <sup>s3</sup>                                                                                                                                      | 5 926                  | 1         |
|                                  | Tomita <i>et al.</i> <sup>s7</sup>                                                                                                                                    | 49 413                 | 1         |
|                                  | UCLEB <sup>s6</sup>                                                                                                                                                   | 5 691                  | 3§        |
| Urate - CHD                      | Wheeler <i>et al.</i> <sup>4</sup>                                                                                                                                    | 174 326(9 458 cases)   | 17        |
|                                  | UCLEB <sup>s6</sup>                                                                                                                                                   | 1 944 (326 cases)      | 1         |
| <b>Genetic Association</b>       |                                                                                                                                                                       |                        |           |
| SNP - urate                      | Köttgen <i>et al.</i> <sup>s8</sup>                                                                                                                                   | 110 347                | 48        |
|                                  | Kolz <i>et al.</i> <sup>s9</sup>                                                                                                                                      | 27 817                 | 14        |
|                                  | UCLEB <sup>s6</sup>                                                                                                                                                   | 7 151                  | 3         |
| SNP – CHD                        | CARDIoGRAM <sup>s10</sup> <b>and/or</b>                                                                                                                               | 78 856 (19 368 cases)  | 37        |
|                                  | C4D <sup>s11</sup> <b>or</b>                                                                                                                                          | 30 393 (15 357 cases)  | 14        |
|                                  | CARDIoGRAM plus C4D <sup>s12</sup>                                                                                                                                    | 186 203 (60 785 cases) | 48        |
|                                  | <b>with</b> UCLEB <sup>s6</sup>                                                                                                                                       | 12 395 (2 131 cases)   | 7         |
| SNP – lipid phenotypes           | GLGC <sup>s13</sup>                                                                                                                                                   | 187 190                | 64        |
|                                  | UCLEB <sup>s6</sup>                                                                                                                                                   | 9 431                  | 4         |
| SNP – T2D                        | DIAGRAM <sup>s14</sup>                                                                                                                                                | 69 033 (12 717 cases)  | 12        |
|                                  | UCLEB <sup>s6</sup>                                                                                                                                                   | 15 605 (2 643 cases)   | 8         |
| SNP – fasting glucose            | MAGIC <sup>s15</sup>                                                                                                                                                  | 46 186                 | 21        |
|                                  | UCLEB <sup>s6</sup>                                                                                                                                                   | 11 211                 | 7         |
| SNP - BP                         | ICBP <sup>s16</sup>                                                                                                                                                   | 69 590                 | 29        |
|                                  | UCLEB <sup>s6</sup>                                                                                                                                                   | 20 077                 | 8         |
| SNP - BMI                        | GIANT <sup>s17</sup>                                                                                                                                                  | 127 600                | 64        |
| <b>Confounding associations</b>  |                                                                                                                                                                       |                        |           |
| TC - CHD                         | Liese <i>et al.</i> , UCLEB, Fang <i>et al.</i> , Tomita <i>et al.</i> , Medalie <i>et al.</i> <sup>s1,s3,s4,s6,s7</sup>                                              | 64 446                 | 5         |
| HDLc - CHD                       | Liese <i>et al.</i> , UCLEB, Puddu <i>et al.</i> , Moriarity <i>et al.</i> <sup>s1,s2,s5,s6</sup>                                                                     | 22 669                 | 4         |
| LDLc - CHD                       | UCLEB, Moriarity <i>et al.</i> <sup>s5, s6</sup>                                                                                                                      | 19 195                 | 2         |
| TG - CHD                         | Moriarity <i>et al.</i> , UCLEB, Medalie <i>et al.</i> <sup>s4,s5, s6</sup>                                                                                           | 25 606                 | 3         |
| BMI - CHD                        | Fang <i>et al.</i> , Moriarity <i>et al.</i> , Puddu <i>et al.</i> , Liese <i>et al.</i> , UCLEB, Tomita <i>et al.</i> , Medalie <i>et al.</i> <sup>s1-s7,</sup>      | 84 419                 | 7         |
| Fasting glucose - CHD            | Puddu <i>et al.</i> , UCLEB, Medalie <i>et al.</i> <sup>s2,s4,s6</sup>                                                                                                | 15 471                 | 3         |
| SBP - CHD                        | Fang <i>et al.</i> , Moriarity <i>et al.</i> , Puddu <i>et al.</i> , Liese <i>et al.</i> , UCLEB, Tomita <i>et al.</i> , Medalie <i>et al.</i> <sup>s1,s4,s6,s7</sup> | 84 419                 | 7         |
| DPB - CHD                        | Liese <i>et al.</i> , UCLEB, Fang <i>et al.</i> , Tomita <i>et al.</i> , Medalie <i>et al.</i> <sup>s1,s3,s4,s6,s7</sup>                                              | 19 033                 | 4         |

\* BRHS and BWHHS; § BRHS, BWHHS and CaPS; Moriarty *et al.* consisted of 4 communities

Table S3. SNPs used to construct the genetic instrument for plasma urate<sup>a</sup>.

| Ind ex | SNP        | CHR | BP        | GENE (nearest/GRAIL) | Allel e | Meta-analysis beta | Meta-analysis SE | N      | S  | Source Data                                                        |
|--------|------------|-----|-----------|----------------------|---------|--------------------|------------------|--------|----|--------------------------------------------------------------------|
| 1      | rs1471633  | 1   | 144435096 | PDZK1/PDZK1          | A       | 0.0568             | 0.0050           | 116404 | 54 | Köttgen <sup>ss</sup> and UCLEB <sup>ss</sup>                      |
| 2      | rs1260326  | 2   | 27584444  | GCKR/GCKR            | T       | 0.0693             | 0.0049           | 117293 | 54 | Köttgen <sup>ss</sup> and UCLEB <sup>ss</sup>                      |
| 3      | rs12498742 | 4   | 9553150   | SLC2A9/SLC2A9        | A       | 0.3600             | 0.0051           | 145110 | 68 | Köttgen <sup>ss</sup> , UCLEB <sup>ss</sup> and Kolz <sup>sg</sup> |
| 4      | rs2231142  | 4   | 89271347  | ABCG2/ABCG2          | T       | 0.1896             | 0.0077           | 140915 | 68 | Köttgen <sup>ss</sup> , UCLEB <sup>ss</sup> and Kolz <sup>sg</sup> |
| 5      | rs675209   | 6   | 7047083   | RREB1/RREB1          | T       | 0.0556             | 0.0059           | 117293 | 54 | Köttgen <sup>ss</sup> and UCLEB <sup>ss</sup>                      |
| 6      | rs1165151  | 6   | 25929595  | SLC17A1/SLC17A3      | T       | -0.0779            | 0.0042           | 145201 | 68 | Köttgen <sup>ss</sup> , UCLEB <sup>ss</sup> and Kolz <sup>sg</sup> |
| 7      | rs1171614  | 10  | 61139544  | SLC16A9/SLC16A9      | T       | -0.0790            | 0.0070           | 110000 | 49 | Köttgen <sup>ss</sup>                                              |
| 8      | rs2078267  | 11  | 64090690  | SLC22A11/SLC22A11    | T       | -0.0732            | 0.0058           | 117293 | 54 | Köttgen <sup>ss</sup> and UCLEB <sup>ss</sup>                      |
| 9      | rs478607   | 11  | 64234639  | NRXN2/SLC22A12       | A       | -0.0264            | 0.0056           | 137967 | 49 | Köttgen <sup>ss</sup>                                              |
| 10     | rs3741414  | 12  | 56130316  | INHBC/INHBE          | T       | -0.0649            | 0.0068           | 117293 | 54 | Köttgen <sup>ss</sup> and UCLEB <sup>ss</sup>                      |
| 11     | rs11264341 | 1   | 153418117 | TRIM46/PKLR          | T       | -0.0500            | 0.0060           | 110000 | 49 | Köttgen <sup>ss</sup>                                              |
| 12     | rs17050272 | 2   | 121022910 | INHBB/INHBB          | A       | 0.0350             | 0.0060           | 110000 | 49 | Köttgen <sup>ss</sup>                                              |
| 13     | rs6770152  | 3   | 53075254  | SFMBT1/MUSTN1        | T       | -0.0440            | 0.0050           | 110000 | 49 | Köttgen <sup>ss</sup>                                              |
| 14     | rs17632159 | 5   | 72467238  | TMEM171/TMEM171      | C       | -0.0390            | 0.0060           | 110000 | 49 | Köttgen <sup>ss</sup>                                              |
| 15     | rs729761   | 6   | 43912549  | VEGFA/VEGFA          | T       | -0.0470            | 0.0060           | 110000 | 49 | Köttgen <sup>ss</sup>                                              |
| 16     | rs1178977  | 7   | 72494985  | BAZ1B/MLXIPL         | A       | 0.0470             | 0.0070           | 110000 | 49 | Köttgen <sup>ss</sup>                                              |
| 17     | rs10480300 | 7   | 151036938 | PRKAG2/PRKAG2        | T       | 0.0350             | 0.0060           | 110000 | 49 | Köttgen <sup>ss</sup>                                              |
| 18     | rs2941484  | 8   | 76641323  | HNF4G/HNF4G          | T       | 0.0440             | 0.0050           | 110000 | 49 | Köttgen <sup>ss</sup>                                              |
| 19     | rs10821905 | 10  | 52316099  | A1CF/ASAH2           | A       | 0.0570             | 0.0070           | 110000 | 49 | Köttgen <sup>ss</sup>                                              |
| 20     | rs642803   | 11  | 65317196  | OVOL1/LTBP3          | T       | -0.0360            | 0.0050           | 110000 | 49 | Köttgen <sup>ss</sup>                                              |
| 21     | rs653178   | 12  | 110492139 | ATXN2/PTPN11         | T       | -0.0350            | 0.0050           | 110000 | 49 | Köttgen <sup>ss</sup>                                              |
| 22     | rs1394125  | 15  | 73946038  | UBE2Q2/NRG4          | A       | 0.0430             | 0.0060           | 110000 | 49 | Köttgen <sup>ss</sup>                                              |
| 23     | rs6598541  | 15  | 97088658  | IGF1R/IGF1R          | A       | 0.0430             | 0.0060           | 110000 | 49 | Köttgen <sup>ss</sup>                                              |
| 24     | rs7193778  | 16  | 68121391  | NFAT5/NFAT5          | T       | -0.0460            | 0.0080           | 110000 | 49 | Köttgen <sup>ss</sup>                                              |
| 25     | rs7188445  | 16  | 78292488  | MAF/MAF              | A       | -0.0320            | 0.0050           | 110000 | 49 | Köttgen <sup>ss</sup>                                              |
| 26     | rs7224610  | 17  | 50719787  | HLF/HLF              | A       | -0.0420            | 0.0050           | 110000 | 49 | Köttgen <sup>ss</sup>                                              |
| 27     | rs742132   | 6   | 25715550  | LRRC16A/LRRC16A      | A       | 0.0540             | 0.0092           | 27923  | 14 | Kolz <sup>sg</sup>                                                 |
| 28     | rs2307394  | 2   | 148432898 | ORC4L/ACVR2A         | T       | -0.0290            | 0.0050           | 110000 | 49 | Köttgen <sup>ss</sup>                                              |
| 29     | rs17786744 | 8   | 23832951  | STC1/STC1            | A       | -0.0290            | 0.0050           | 110000 | 49 | Köttgen <sup>ss</sup>                                              |
| 30     | rs2079742  | 17  | 56820479  | BCAS3/C17orf82       | T       | 0.0430             | 0.0080           | 110000 | 49 | Köttgen <sup>ss</sup>                                              |
| 31     | rs164009   | 17  | 71795264  | QRICH2/PRPSAP1       | A       | 0.028              | 0.005            | 110000 | 49 | Köttgen <sup>ss</sup>                                              |

<sup>a</sup> Units are SD uric acid per copy of effect allele using a population SD for uric acid of 90.7  $\mu\text{mol/L}$  (=1.5 mg/dl) reported by CHARGE. (Yang et al.).<sup>2</sup>

Table S4. Association of the 31 SNP plasma urate instrument with cardiovascular traits.

| Cardio-vascular trait*   | Difference in risk factor per inverse variance weighted allele. | 95%CI            |
|--------------------------|-----------------------------------------------------------------|------------------|
| HDL-C (mmol/L)           | -0.0079                                                         | -0.0096, -0.0062 |
| LDL-C (mmol/L)           | -0.0014                                                         | -0.0032, 0.0005  |
| TC (mmol/L)              | 0.0003                                                          | -0.0015, 0.0021  |
| TG (mmol/L)              | 0.0142                                                          | 0.0125, 0.0158   |
| SBP (mm Hg)              | 0.0045                                                          | 0.0026, 0.0064   |
| DBP (mm Hg)              | 0.0054                                                          | 0.0033, 0.0074   |
| Fasting glucose (mmol/L) | -0.0010                                                         | -0.0026, 0.0006  |
| BMI (kg/m <sup>2</sup> ) | -0.0003                                                         | -0.0008, 0.0002  |
| Diabetes (OR)            | 0.9991                                                          | 0.992, 1.0064    |

\* See Table S2 for numbers of individuals and studies

Table S5. Proxy SNPs used in the Instrument.

| Index | Lead SNP   | Proxy SNP | R <sup>2</sup> |
|-------|------------|-----------|----------------|
| 3     | rs12498742 | rs734553  | 0.89           |
| 6     | rs1165151  | rs1183201 | 1              |
| 9     | rs478607   | rs505802  | 0.44           |

Table S6. Power (two-sided  $\alpha=0.05$ ) for conventional IV regression of the binary outcomes.

| Outcome | Proportion cases | Observational OR (per SD urate) | R <sup>2</sup> of instrument | N required for 80% power | Actual n | Power at actual n |
|---------|------------------|---------------------------------|------------------------------|--------------------------|----------|-------------------|
| CHD     | 0.317            | 1.07                            | 0.042                        | 183868                   | 198598   | 0.83              |
| T2D     | 0.175            | 1.32                            | 0.042                        | 13910                    | 84638    | 1                 |

Table S7. Power ( $\alpha=0.05$ ) for conventional IV regression of the continuous outcomes.

| Outcome (units)          | $\beta_{yx}(\text{true})^a$ | $R^2$ | N required for 80% power | Actual n | Power at actual n |
|--------------------------|-----------------------------|-------|--------------------------|----------|-------------------|
| LDL-C (mmol/L)           | 0.073                       | 0.042 | 34882                    | 196621   | 1                 |
| HDL-C (mmol/L)           | -0.183                      | 0.042 | 5394                     | 196621   | 1                 |
| TC (mmol/L)              | 0.129                       | 0.042 | 11044                    | 196621   | 1                 |
| TG (mmol/L)              | 0.265                       | 0.042 | 2475                     | 196621   | 1                 |
| SBP (mmHg)               | 0.163                       | 0.042 | 6847                     | 89667    | 1                 |
| DBP (mmHg)               | 0.169                       | 0.042 | 6357                     | 89667    | 1                 |
| Fasting Glucose (mmol/L) | -0.039                      | 0.042 | 122697                   | 57397    | 0.48              |

Table S8. Gene Ontology Enrichment Analysis.

| Term (GO reference)                                       | Background frequency | Sample frequency | Bonferroni corrected P-value |
|-----------------------------------------------------------|----------------------|------------------|------------------------------|
| urate metabolic process (GO:0046415)                      | 13                   | 7                | 3.96E-13                     |
| purine-containing compound metabolic process (GO:0072521) | 311                  | 8                | 5.57E-05                     |
| heterocycle metabolic process (GO:0046483)                | 4328                 | 19               | 1.84E-03                     |
| cellular aromatic compound metabolic process (GO:0006725) | 4332                 | 19               | 1.87E-03                     |
| organic cyclic compound metabolic process (GO:1901360)    | 4571                 | 19               | 4.51E-03                     |
| cellular nitrogen compound metabolic process (GO:0034641) | 4598                 | 19               | 4.97E-03                     |
| nitrogen compound metabolic process (GO:0006807)          | 5014                 | 19               | 2.01E-02                     |

<sup>a</sup> See Table S2 for sources of data used to estimate the regression coefficient. Units are SD/SD.



Table S9. Function and druggability of genes represented in the genetic instrument for plasma urate.

| SNP        | CHR | GENE (nearest/G RAIL) | Drugs              | Gene function (from; <a href="http://www.genecards.org/">http://www.genecards.org/</a> )                                                                                                                                                                                                                                                                                                                                                                                                                                                                                                                                                                                                                                                                                                                                                                                                                 |
|------------|-----|-----------------------|--------------------|----------------------------------------------------------------------------------------------------------------------------------------------------------------------------------------------------------------------------------------------------------------------------------------------------------------------------------------------------------------------------------------------------------------------------------------------------------------------------------------------------------------------------------------------------------------------------------------------------------------------------------------------------------------------------------------------------------------------------------------------------------------------------------------------------------------------------------------------------------------------------------------------------------|
| rs1471633  | 1   | PDZK1/PDZ K1          | None               | PDZK1: This gene encodes a PDZ domain-containing scaffolding protein. PDZ domain-containing molecules bind to and mediate the subcellular localization of target proteins. The encoded protein mediates the localization of cell surface proteins and plays a critical role in cholesterol metabolism by regulating the HDL receptor, scavenger receptor class B type 1. Single nucleotide polymorphisms in this gene may be associated with metabolic syndrome, and overexpression of this gene may play a role in drug resistance of multiple myeloma. Pseudogenes of this gene are located on the long arm of chromosome 1. Alternatively spliced transcript variants encoding multiple isoforms have been observed for this gene.                                                                                                                                                                    |
| rs1260326  | 2   | GCKR/GCK R            | In development. 61 | This gene encodes a protein belonging to the GCKR subfamily of the SIS (Sugar ISomerase) family of proteins. The gene product is a regulatory protein that inhibits glucokinase in liver and pancreatic islet cells by binding non-covalently to form an inactive complex with the enzyme. This gene is considered a susceptibility gene candidate for a form of maturity-onset diabetes of the young (MODY).                                                                                                                                                                                                                                                                                                                                                                                                                                                                                            |
| rs12498742 | 4   | SLC2A9/SL C2A9        | None               | This gene encodes a member of the SLC2A facilitative glucose transporter family. Members of this family play a significant role in maintaining glucose homeostasis. The encoded protein may play a role in the development and survival of chondrocytes in cartilage matrices. Two transcript variants encoding distinct isoforms have been identified for this gene.                                                                                                                                                                                                                                                                                                                                                                                                                                                                                                                                    |
| rs2231142  | 4   | ABCG2/AB CG2          |                    | The membrane-associated protein encoded by this gene is included in the superfamily of ATP-binding cassette (ABC) transporters. ABC proteins transport various molecules across extra- and intra-cellular membranes. ABC genes are divided into seven distinct subfamilies (ABC1, MDR/TAP, MRP, ALD, OABP, GCN20, White). This protein is a member of the White subfamily. Alternatively referred to as a breast cancer resistance protein, this protein functions as a xenobiotic transporter which may play a major role in multi-drug resistance. It likely serves as a cellular defense mechanism in response to mitoxantrone and anthracycline exposure. Significant expression of this protein has been observed in the placenta, which may suggest a potential role for this molecule in placenta tissue. Multiple transcript variants encoding different isoforms have been found for this gene. |
| rs675209   | 6   | RREB1/RR EB1          | None               | RREB1: The protein encoded by this gene is a zinc finger transcription factor that binds to RAS-responsive elements (RREs) of gene promoters. It has been shown that the calcitonin gene promoter contains an RRE and that the encoded protein binds there and increases expression of calcitonin, which may be involved in Ras/Raf-mediated cell differentiation. Multiple transcript variants encoding several different isoforms have been found for this gene. LY86: May cooperate with CD180 and TLR4 to mediate the innate immune response to bacterial lipopolysaccharide (LPS) and cytokine production. Important for efficient CD180 cell surface expression (By similarity)                                                                                                                                                                                                                    |
| rs1165151  | 6   | SLC17A1/S LC17A3      | None               | SLC17A1 (solute carrier family 17 (organic anion transporter), member 1) is a protein-coding gene. Diseases associated with SLC17A1 include cardiovascular disease risk factor. GO annotations related to this gene include sodium-dependent phosphate transmembrane transporter activity and symporter activity. An important paralog of this gene is SLC17A7.                                                                                                                                                                                                                                                                                                                                                                                                                                                                                                                                          |
| rs1171614  | 10  | SLC16A9/S LC16A9      | None               | SLC16A9 (solute carrier family 16, member 9) is a protein-coding gene. GO annotations related to this gene include symporter activity. An important paralog of this gene is SLC16A4.                                                                                                                                                                                                                                                                                                                                                                                                                                                                                                                                                                                                                                                                                                                     |

| SNP        | CHR | GENE<br>(nearest/G<br>RAIL) | Drugs                                                                                    | Gene function (from; <a href="http://www.genecards.org/">http://www.genecards.org/</a> )                                                                                                                                                                                                                                                                                                                                                                                                                                                                                                                         |
|------------|-----|-----------------------------|------------------------------------------------------------------------------------------|------------------------------------------------------------------------------------------------------------------------------------------------------------------------------------------------------------------------------------------------------------------------------------------------------------------------------------------------------------------------------------------------------------------------------------------------------------------------------------------------------------------------------------------------------------------------------------------------------------------|
| rs2078267  | 11  | SLC22A11/<br>SLC22A11       | Probenecid                                                                               | SLC22A11 (solute carrier family 22 (organic anion/urate transporter), member 11) is a protein-coding gene. Diseases associated with SLC22A11 include cardiovascular disease risk factor. GO annotations related to this gene include inorganic anion exchanger activity and sodium-independent organic anion transmembrane transporter activity. An important paralog of this gene is SLC22A5.                                                                                                                                                                                                                   |
| rs478607   | 11  | NRXN2/SL<br>C22A12          | Sulfinpyrazone                                                                           | SLC22A12 (solute carrier family 22 (organic anion/urate transporter), member 12) is a protein-coding gene. Diseases associated with SLC22A12 include renal hypouricemia 1, and renal hypouricemia. GO annotations related to this gene include PDZ domain binding and urate transmembrane transporter activity. An important paralog of this gene is SLC22A11.                                                                                                                                                                                                                                                   |
| rs3741414  | 12  | INHBC/INH<br>BE             | None                                                                                     | INHBC (inhibin, beta C) is a protein-coding gene. Diseases associated with INHBC include gastric diffuse adenocarcinoma, and endometrial adenocarcinoma. GO annotations related to this gene include growth factor activity and transforming growth factor beta receptor binding. An important paralog of this gene is GDF11. / INHBE: (inhibin, beta E) is a protein-coding gene. Diseases associated with INHBE include endometrial adenocarcinoma, and germ cell tumors. GO annotations related to this gene include growth factor activity and hormone activity. An important paralog of this gene is GDF11. |
| rs11264341 | 1   | TRIM46/PK<br>LR             | None/compounds<br>in development                                                         | TRIM46: Protein coding. Paaralog is TRIM13 which is associated with leukemia. PKLR: The protein encoded by this gene is a pyruvate kinase that catalyzes the transphosphorylation of phohsphoenolpyruvate into pyruvate and ATP, which is the rate-limiting step of glycolysis. Associated with hemolytic anemia.                                                                                                                                                                                                                                                                                                |
| rs17050272 | 2   | INHBB/INH<br>BB             | None                                                                                     | INHBB: A protein-coding gene. Diseases associated with INHBB include varicocele, and ectopic pregnancy. GO annotations related to this gene include growth factor activity and protein homodimerization activity. An important paralog of this gene is GDF11.                                                                                                                                                                                                                                                                                                                                                    |
| rs6770152  | 3   | SFMBT1/M<br>USTN1           | None/None                                                                                | SFMBT1: (Scm-like with four mbt domains 1) is a protein-coding gene. Diseases associated with SFMBT1 include normal pressure hydrocephalus, and acute poststreptococcal glomerulonephritis. GO annotations related to this gene include histone binding and transcription corepressor activity. An important paralog of this gene is L3MBTL1./MUSTN1: May be involved in the development and regeneration of the musculoskeletal system (By similarity)                                                                                                                                                          |
| rs17632159 | 5   | TMEM171/T<br>MEM171         | None                                                                                     | Transmembrane protein.                                                                                                                                                                                                                                                                                                                                                                                                                                                                                                                                                                                           |
| rs729761   | 6   | VEGFA/VE<br>GFA             | Pegaptanib<br>Sodium(Top),<br>Ranibizumab(Top),<br>Aflibercept(Top),<br>Bevacizumab(Can) | Growth factor active in angiogenesis, vasculogenesis and endothelial cell growth. Induces endothelial cell proliferation, promotes cell migration, inhibits apoptosis and induces permeabilization of blood vessels. Binds to the FLT1/VEGFR1 and KDR/VEGFR2 receptors, heparan sulfate and heparin. NRP1/Neuropilin-1 binds isoforms VEGF-165 and VEGF-145. Isoform VEGF165B binds to KDR but does not activate downstream signaling pathways, does not activate angiogenesis and inhibits tumor growth.                                                                                                        |
| rs1178977  | 7   | BAZ1B/MLX<br>IPL            | None/None                                                                                | BAZ1B: (bromodomain adjacent to zinc finger domain, 1B) is a protein-coding gene. Diseases associated with BAZ1B include williams-beuren syndrome, and williams syndrome. GO annotations related to this gene include chromatin binding and non-membrane spanning protein tyrosine kinase activity. An important paralog of this gene is BAZ1A./MLXIPL: This gene encodes a basic helix-loop-helix leucine zipper transcription factor of the Myc/Max/Mad superfamily. This protein forms a heterodimeric complex and binds and activates, in a glucose-dependent manner, carbohydrate response element          |

| SNP        | CHR | GENE<br>(nearest/G<br>RAIL) | Drugs                                             | Gene function (from; <a href="http://www.genecards.org/">http://www.genecards.org/</a> )                                                                                                                                                                                                                                                                                                                                                                                                                                                                                                                                                                                                                                                                                                                                                                                                                                                                                                                                                                                                                           |
|------------|-----|-----------------------------|---------------------------------------------------|--------------------------------------------------------------------------------------------------------------------------------------------------------------------------------------------------------------------------------------------------------------------------------------------------------------------------------------------------------------------------------------------------------------------------------------------------------------------------------------------------------------------------------------------------------------------------------------------------------------------------------------------------------------------------------------------------------------------------------------------------------------------------------------------------------------------------------------------------------------------------------------------------------------------------------------------------------------------------------------------------------------------------------------------------------------------------------------------------------------------|
|            |     |                             |                                                   | (ChoRE) motifs in the promoters of triglyceride synthesis genes. The gene is deleted in Williams-Beuren syndrome, a multisystem developmental disorder caused by the deletion of contiguous genes at chromosome 7q11.23.                                                                                                                                                                                                                                                                                                                                                                                                                                                                                                                                                                                                                                                                                                                                                                                                                                                                                           |
| rs10480300 | 7   | PRKAG2/P<br>RKAG2           | None                                              | PRKAG2 (protein kinase, AMP-activated, gamma 2 non-catalytic subunit) is a protein-coding gene. Diseases associated with PRKAG2 include cardiomyopathy, familial hypertrophic 6, and wolff-parkinson-white syndrome. GO annotations related to this gene include protein kinase binding and cAMP-dependent protein kinase regulator activity. An important paralog of this gene is PRKAG1                                                                                                                                                                                                                                                                                                                                                                                                                                                                                                                                                                                                                                                                                                                          |
| rs2941484  | 8   | HNF4G/HN<br>F4G             | None                                              | HNF4G (hepatocyte nuclear factor 4, gamma) is a protein-coding gene. GO annotations related to this gene include steroid hormone receptor activity and sequence-specific DNA binding transcription factor activity. An important paralog of this gene is RXRA.                                                                                                                                                                                                                                                                                                                                                                                                                                                                                                                                                                                                                                                                                                                                                                                                                                                     |
| rs10821905 | 10  | A1CF/ASA<br>H2              | None                                              | A1CF: Essential component of the apolipoprotein B mRNA editing enzyme complex which is responsible for the postranscriptional editing of a CAA codon for Gln to a UAA codon for stop in APOB mRNA. Binds to APOB mRNA and is probably responsible for docking the catalytic subunit, APOBEC1, to the mRNA to allow it to deaminate its target cytosine. The complex also protects the edited APOB mRNA from nonsense-mediated decay/ASAH2: Hydrolyzes the sphingolipid ceramide into sphingosine and free fatty acid at an optimal pH of 6.5-8.5. Acts as a key regulator of sphingolipid signaling metabolites by generating sphingosine at the cell surface. Acts as a repressor of apoptosis both by reducing C16-ceramide, thereby preventing ceramide-induced apoptosis, and generating sphingosine, a precursor of the antiapoptotic factor sphingosine 1-phosphate. Probably involved in the digestion of dietary sphingolipids in intestine by acting as a key enzyme for the catabolism of dietary sphingolipids and regulating the levels of bioactive sphingolipid metabolites in the intestinal tract. |
| rs642803   | 11  | OVOL1/LTB<br>P3             | None                                              | OVOL1: Putative transcription factor. Involved in hair formation and spermatogenesis. May function in the differentiation and/or maintenance of the urogenital system (By similarity)/LTBP3: May be involved in the assembly, secretion and targeting of TGFB1 to sites at which it is stored and/or activated. May play critical roles in controlling and directing the activity of TGFB1. May have a structural role in the extra cellular matrix (ECM)                                                                                                                                                                                                                                                                                                                                                                                                                                                                                                                                                                                                                                                          |
| rs653178   | 12  | ATXN2/PTP<br>N11            | None/Enoxolone                                    | ATXN2: Involved in EGFR trafficking, acting as negative regulator of endocytic EGFR internalization at the plasma membrane./PTPN11: Acts downstream of various receptor and cytoplasmic protein tyrosine kinases to participate in the signal transduction from the cell surface to the nucleus. Dephosphorylates ROCK2 at Tyr-722 resulting in stimulation of its RhoA binding activity.                                                                                                                                                                                                                                                                                                                                                                                                                                                                                                                                                                                                                                                                                                                          |
| rs1394125  | 15  | UBE2Q2/N<br>RG4             | None                                              | UBE2Q2: Accepts ubiquitin from the E1 complex and catalyzes its covalent attachment to other proteins. In vitro catalyzes 'Lys-48'-linked polyubiquitination/ NRG4: Low affinity ligand for the ERBB4 tyrosine kinase receptor. Concomitantly recruits ERBB1 and ERBB2 coreceptors, resulting in ligand-stimulated tyrosine phosphorylation and activation of the ERBB receptors. Does not bind to the ERBB1, ERBB2 and ERBB3 receptors (By similarity)                                                                                                                                                                                                                                                                                                                                                                                                                                                                                                                                                                                                                                                            |
| rs6598541  | 15  | IGF1R/IGF1<br>R             | Mecasermin<br>Rinfabate (Igf),<br>Mecasermin(Igf) | IGF1R: IGF1R (insulin-like growth factor 1 receptor) is a protein-coding gene. Diseases associated with IGF1R include insulin-like growth factor 1 resistance to, and insulin-like growth factor i deficiency. GO annotations related to this gene include insulin receptor binding and identical protein binding. An important paralog of this gene is ROR1.                                                                                                                                                                                                                                                                                                                                                                                                                                                                                                                                                                                                                                                                                                                                                      |
| rs7193778  | 16  | NFAT5/NFA<br>T5             | None                                              | Transcription factor involved in the transcriptional regulation of osmoprotective and inflammatory genes. Regulates hypertonicity-                                                                                                                                                                                                                                                                                                                                                                                                                                                                                                                                                                                                                                                                                                                                                                                                                                                                                                                                                                                 |

| SNP        | CHR | GENE<br>(nearest/G<br>RAIL) | Drugs                                        | Gene function (from; <a href="http://www.genecards.org/">http://www.genecards.org/</a> )                                                                                                                                                                                                                                                                                                                                                                                                                                                         |
|------------|-----|-----------------------------|----------------------------------------------|--------------------------------------------------------------------------------------------------------------------------------------------------------------------------------------------------------------------------------------------------------------------------------------------------------------------------------------------------------------------------------------------------------------------------------------------------------------------------------------------------------------------------------------------------|
|            |     |                             |                                              | induced cellular accumulation of osmolytes                                                                                                                                                                                                                                                                                                                                                                                                                                                                                                       |
| rs7188445  | 16  | MAF/MAF                     | None                                         | MAF (v-maf avian musculoaponeurotic fibrosarcoma oncogene homolog) is a protein-coding gene. Diseases associated with MAF include nephrogenic adenofibroma, and plasma cell leukemia. GO annotations related to this gene include sequence-specific DNA binding and sequence-specific DNA binding transcription factor activity. An important paralog of this gene is NRL.                                                                                                                                                                       |
| rs7224610  | 17  | HLF/HLF                     | None                                         | HLF (hepatic leukemia factor) is a protein-coding gene. Diseases associated with HLF include leukemia, acute lymphoblastic 3, and acute lymphoblastic leukemia. GO annotations related to this gene include double-stranded DNA binding and sequence-specific DNA binding transcription factor activity. An important paralog of this gene is DBP.                                                                                                                                                                                               |
| rs742132   | 6   | LRRC16A/L<br>RRC16A         | None                                         | LRRC16A (leucine rich repeat containing 16A) is a protein-coding gene. Diseases associated with LRRC16A include acute urate nephropathy. An important paralog of this gene is LRRC16B.                                                                                                                                                                                                                                                                                                                                                           |
| rs2307394  | 2   | ORC4L/AC<br>VR2A            | None/Dasatinib, Les<br>tauratinib, Alvocidib | ORC4 (origin recognition complex, subunit 4) is a protein-coding gene. Diseases associated with ORC4 include meier-gorlin syndrome 2, and meier-gorlin syndrome. GO annotations related to this gene include DNA replication origin binding and nucleotide binding./ACVR2A (activin A receptor, type IIA) is a protein-coding gene. Diseases associated with ACVR2A include multiple synostoses syndrome. GO annotations related to this gene include PDZ domain binding and growth factor binding. An important paralog of this gene is ACVR1C. |
| rs17786744 | 8   | STC1/STC1                   | None                                         | STC1 (stanniocalcin 1) is a protein-coding gene. Diseases associated with STC1 include pheochromocytoma, and fibrosarcoma. GO annotations related to this gene include hormone activity. An important paralog of this gene is STC2. The protein may play a role in the regulation of renal and intestinal calcium and phosphate transport, cell metabolism, or cellular calcium/phosphate homeostasis.                                                                                                                                           |
| rs2079742  | 17  | BCAS3/C17<br>orf82          | None                                         | BCAS3 (breast carcinoma amplified sequence 3) is a protein-coding gene. Diseases associated with BCAS3 include breast cancer./C17orf82 (chromosome 17 open reading frame 82) is a protein-coding gene.                                                                                                                                                                                                                                                                                                                                           |
| rs164009   | 17  | QRICH2/PR<br>PSAP1          | None                                         | QRICH2 (glutamine rich 2) is a protein-coding gene./ PRPSAP1 (phosphoribosyl pyrophosphate synthetase-associated protein 1) is a protein-coding gene. GO annotations related to this gene include enzyme inhibitor activity and magnesium ion binding. An important paralog of this gene is PRPS1.                                                                                                                                                                                                                                               |

Table S10. Sensitivity tests with different covariate models.

| Outcome/Exposure | Covariates      | Point estimate: IV (OR) (95% CI) from MVMR with specified model; full data. | Mean (median) estimate from sensitivity test in which the model was fitted 100,000 times removing 6 SNPs at random from the data in each cycle. | 95% range of estimates from sensitivity test. | % of estimates from the sensitivity test which lie outside the confidence interval of the IV regression. |
|------------------|-----------------|-----------------------------------------------------------------------------|-------------------------------------------------------------------------------------------------------------------------------------------------|-----------------------------------------------|----------------------------------------------------------------------------------------------------------|
| CHD/Urate        | -               | 1.177 (1.076, 1.286)                                                        | 1.184 (1.176)                                                                                                                                   | 1.122, 1.299                                  | 4.85                                                                                                     |
| CHD/Urate        | HDL             | 1.094 (0.991, 1.208)                                                        | 1.096 (1.094)                                                                                                                                   | 1.044, 1.168                                  | 0.34                                                                                                     |
| CHD/Urate        | TG              | 1.173 (1.068, 1.289)                                                        | 1.18 (1.169)                                                                                                                                    | 1.111, 1.314                                  | 6.43*                                                                                                    |
| CHD/Urate        | DBP             | 1.097 (1, 1.202)                                                            | 1.098 (1.103)                                                                                                                                   | 1.022, 1.166                                  | 0.92                                                                                                     |
| CHD/Urate        | SBP             | 1.121 (1.024, 1.227)                                                        | 1.118 (1.128)                                                                                                                                   | 1.008, 1.176                                  | 2.89                                                                                                     |
| CHD/Urate        | SBP+HDL         | 1.111 (1.006, 1.227)                                                        | 1.108 (1.119)                                                                                                                                   | 0.996, 1.171                                  | 2.77                                                                                                     |
| CHD/Urate        | SBP+TG          | 1.136 (1.033, 1.249)                                                        | 1.134 (1.141)                                                                                                                                   | 1.031, 1.216                                  | 2.83                                                                                                     |
| CHD/Urate        | SBP+DBP         | 1.101 (1.003, 1.208)                                                        | 1.101 (1.108)                                                                                                                                   | 1.013, 1.166                                  | 2.12                                                                                                     |
| CHD/Urate        | HDL+TG          | 1.102 (0.999, 1.217)                                                        | 1.103 (1.099)                                                                                                                                   | 1.045, 1.195                                  | 0.75                                                                                                     |
| CHD/Urate        | HDL+DBP         | 1.09 (0.987, 1.203)                                                         | 1.091 (1.095)                                                                                                                                   | 1.018, 1.165                                  | 1.04                                                                                                     |
| CHD/Urate        | TG+DBP          | 1.107 (1.005, 1.218)                                                        | 1.107 (1.111)                                                                                                                                   | 1.028, 1.2                                    | 1.53                                                                                                     |
| CHD/Urate        | TG+DBP+HDL      | 1.094 (0.991, 1.208)                                                        | 1.092 (1.095)                                                                                                                                   | 1.016, 1.18                                   | 1.34                                                                                                     |
| CHD/Urate        | SBP+HDL+DBP     | 1.095 (0.991, 1.211)                                                        | 1.095 (1.101)                                                                                                                                   | 1.006, 1.169                                  | 2.04                                                                                                     |
| CHD/Urate        | SBP+TG+DBP      | 1.114 (1.011, 1.228)                                                        | 1.112 (1.118)                                                                                                                                   | 1.023, 1.202                                  | 2.13                                                                                                     |
| CHD/Urate        | SBP+HDL+TG      | 1.116 (1.011, 1.232)                                                        | 1.111 (1.118)                                                                                                                                   | 1.017, 1.19                                   | 2.42                                                                                                     |
| CHD/Urate        | SBP+HDL+TG+DBP  | 1.101 (0.996, 1.218)                                                        | 1.096 (1.101)                                                                                                                                   | 1.013, 1.185                                  | 1.89                                                                                                     |
| CHD/Urate        | MR Egger method | 1.049 (0.918, 1.200)                                                        | 1.035 (1.045)                                                                                                                                   | 0.699, 1.134                                  | 3.81                                                                                                     |

\* Distribution of sensitivity test does not fit within the assumed normal distribution of the point estimate in full data for the model. This indicates that the model is sensitive to SNP selection and the confidence interval on the point estimate is anti-conservative. Conversely if the value is less than 5% it suggests the model is insensitive to SNP selection and the interval on the point estimate is likely to be conservative.

Figure S1. The distribution of plasma urate concentration in the UCLEB consortium data.

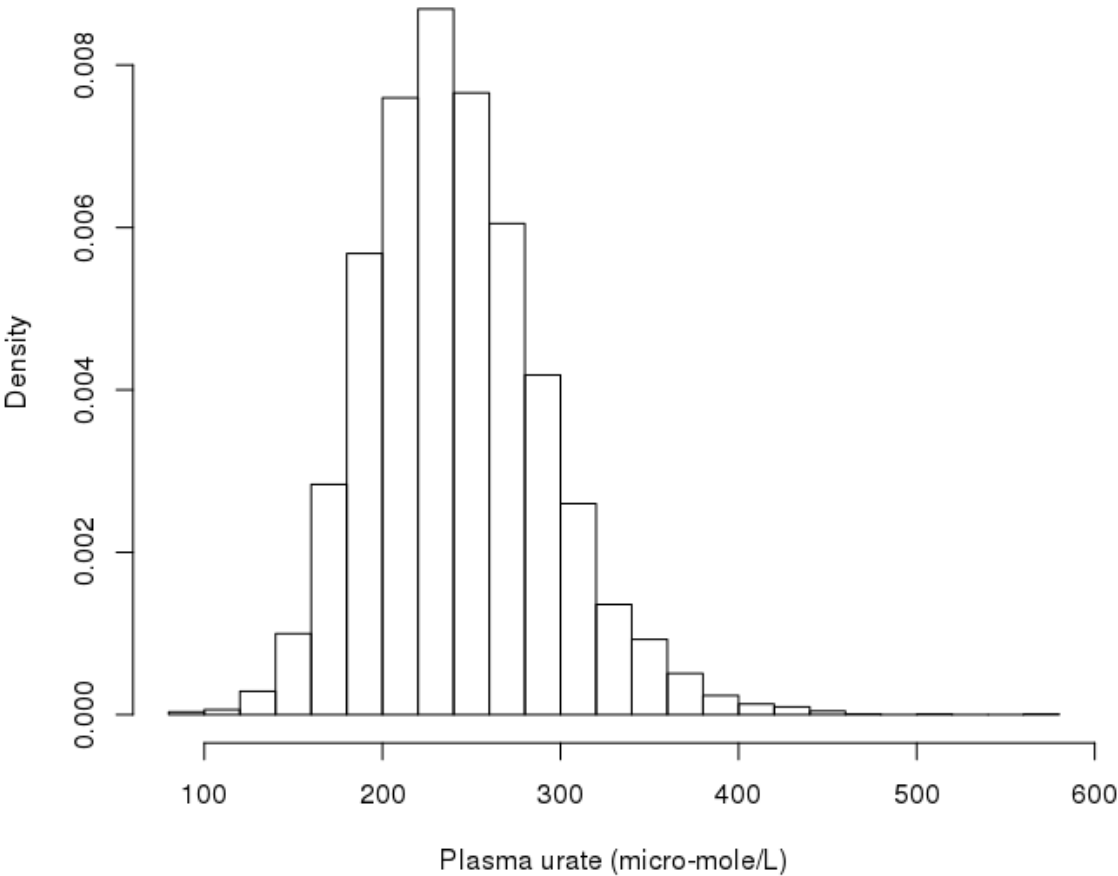

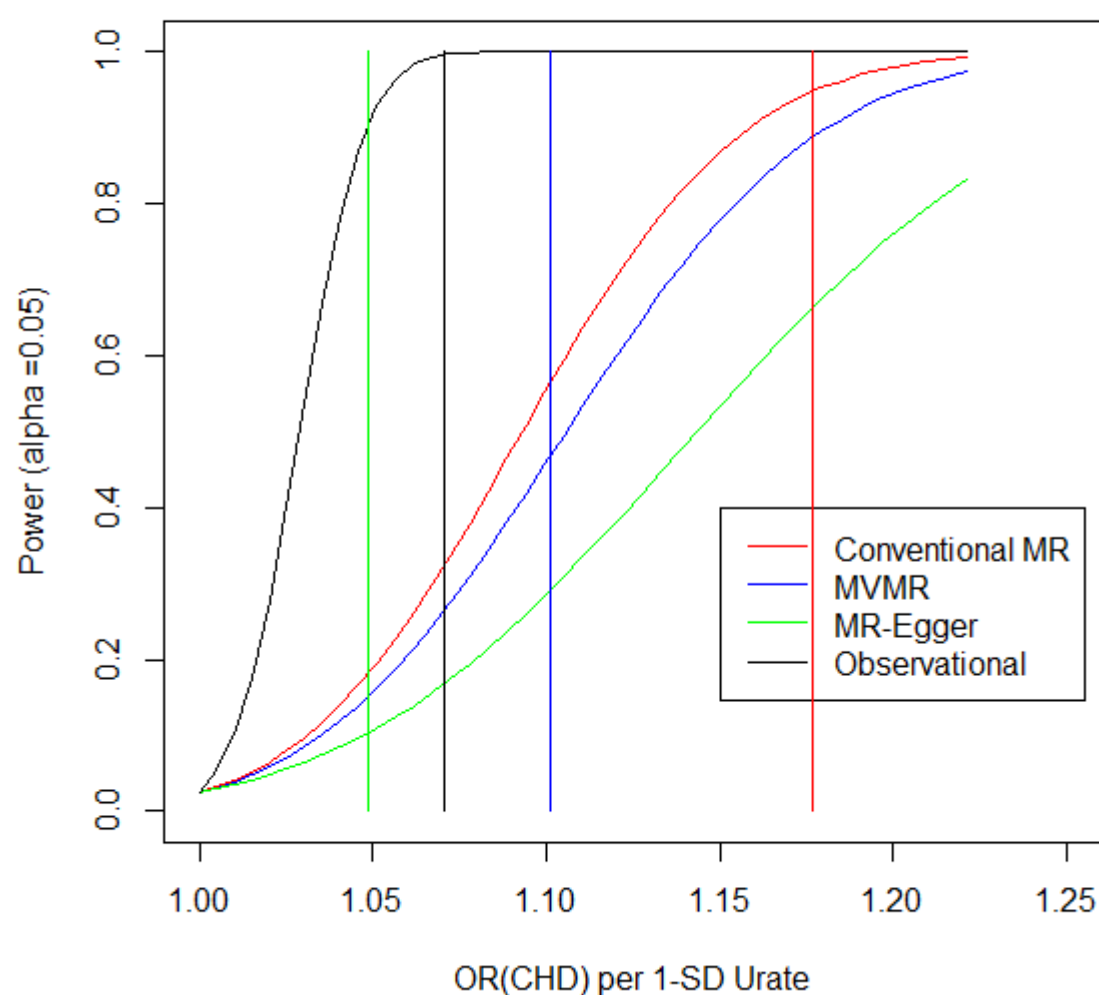

Figure S2. Power curves derived from analytical outcomes. The vertical lines represent the effect, estimated by each method, of plasma urate concentration on CHD risk, colour coded as legend.

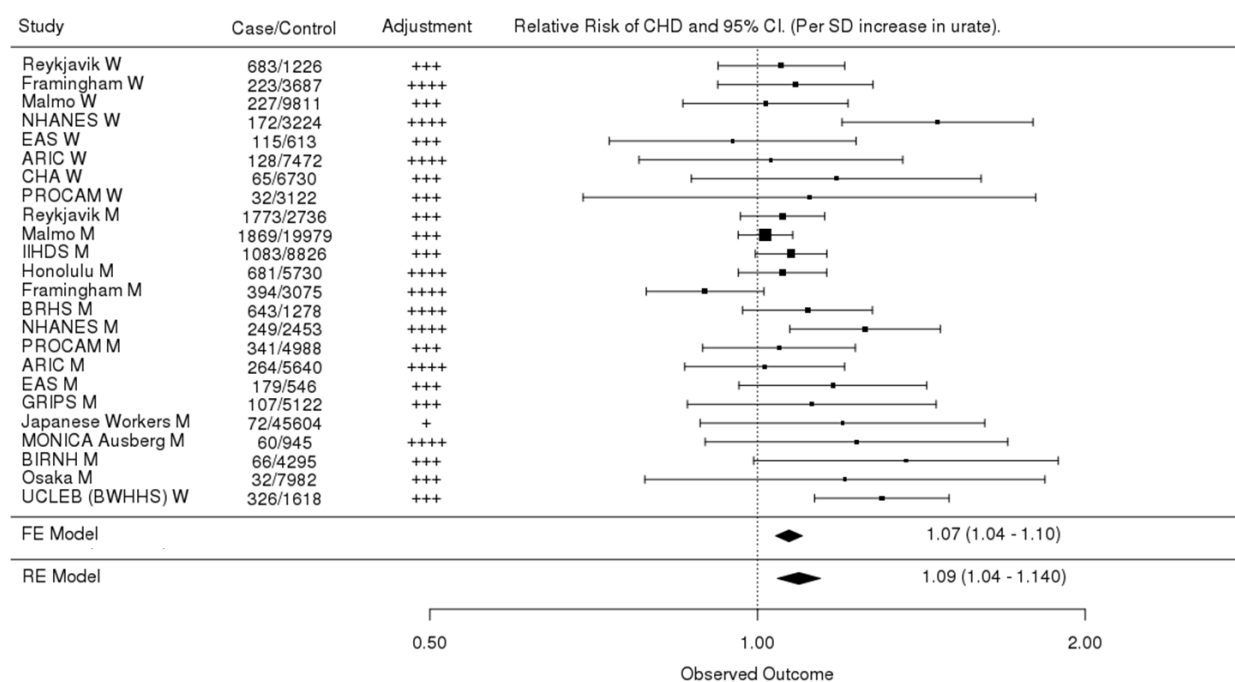

Figure S3. Observational association between plasma urate concentration and relative risk of CHD in 17 prospective population-based cohorts. Summary estimates obtained by fixed-effects (FE) and random effects (RE) meta-analysis are presented. Adjustment: + age and sex; +++ age, sex, smoking and some additional risk factors (not specified by original author), ++++ as +++ with adjustment for pre-existing CHD. Apart from UCLEB (BWHHS) the data were obtained from Wheeler et al. 2005,<sup>s18</sup> the order of studies mirrors that publication.. (Size of point markers is proportional to the inverse variance). W = Women, M = Men.



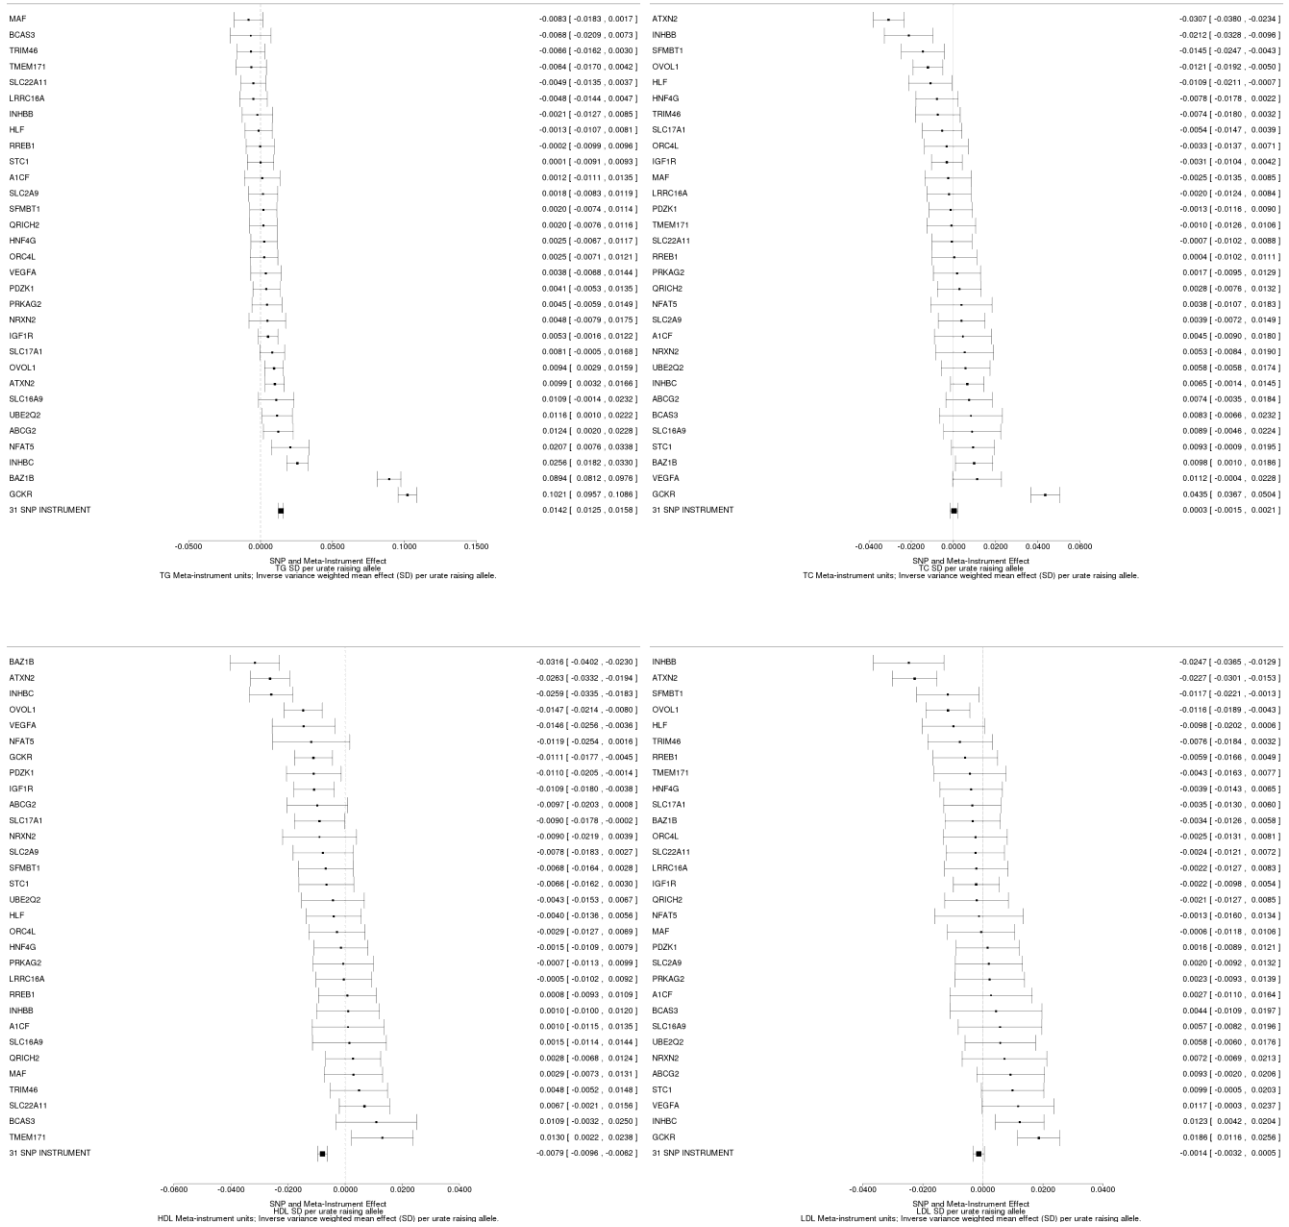

Figure S4. The association of individual SNPs and the 31 SNP instrument for plasma urate concentration with continuous phenotypes. (Error bars are 95%CI, SNP order is by magnitude of effect within a phenotype, and all effects are with respect to the urate raising allele). Significant association in the 31 SNP instrument is indicative of pleiotropy.

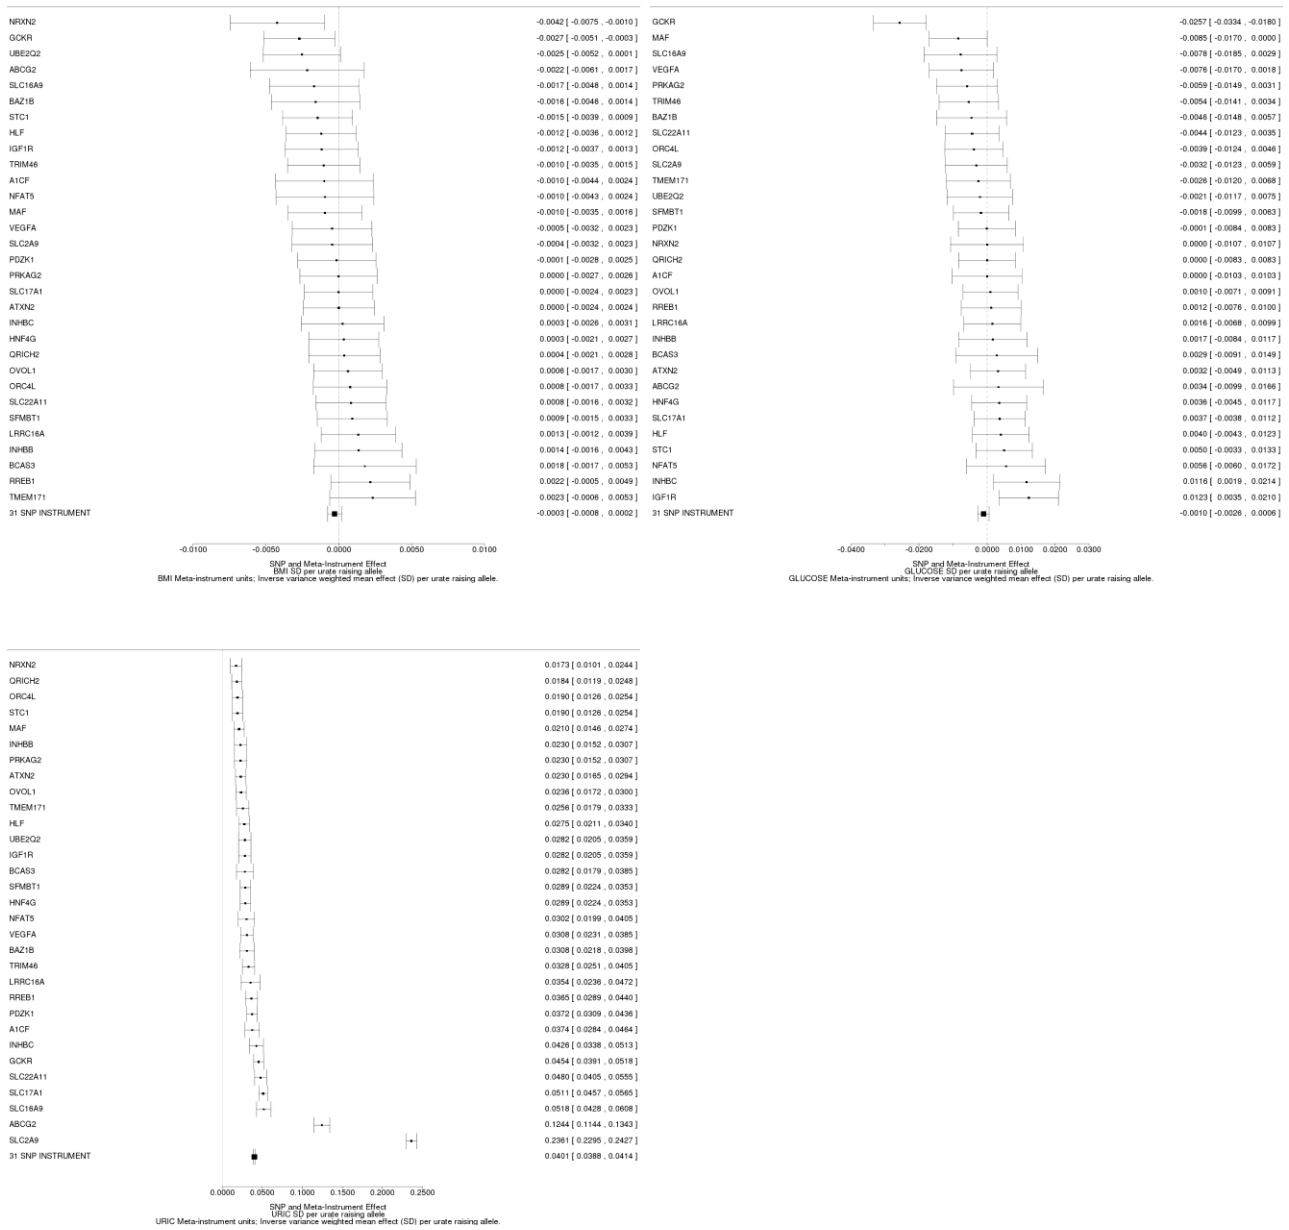

Figure S5. The association of individual SNPs and the 31 SNP instrument for plasma urate concentration with continuous phenotypes. (Error bars are 95%CI, SNP order is by magnitude of effect within a phenotype, and all effects are with respect to the urate raising allele). Significant association in the 31 SNP instrument is indicative of pleiotropy.

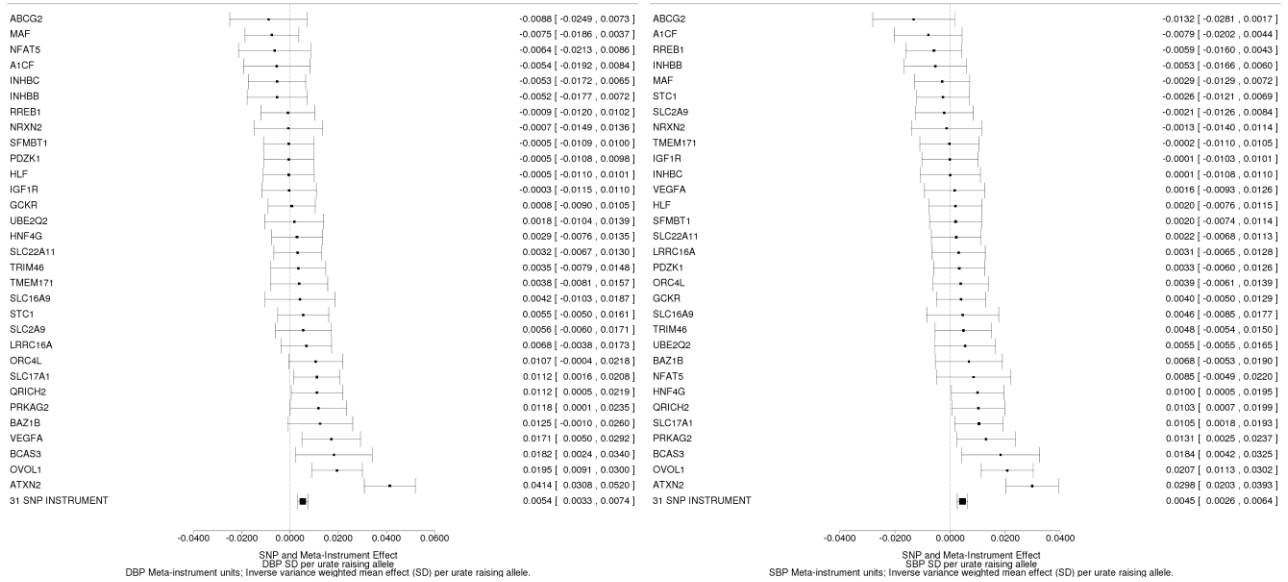

Figure S6. The association of the individual SNPs and the 31 SNP instrument for plasma urate concentration with blood pressure. (Error bars are 95%CI, SNP order is by magnitude of effect within a phenotype, and all effects are with respect to the urate raising allele). Significant association in the 31 SNP instrument is indicative of pleiotropy.

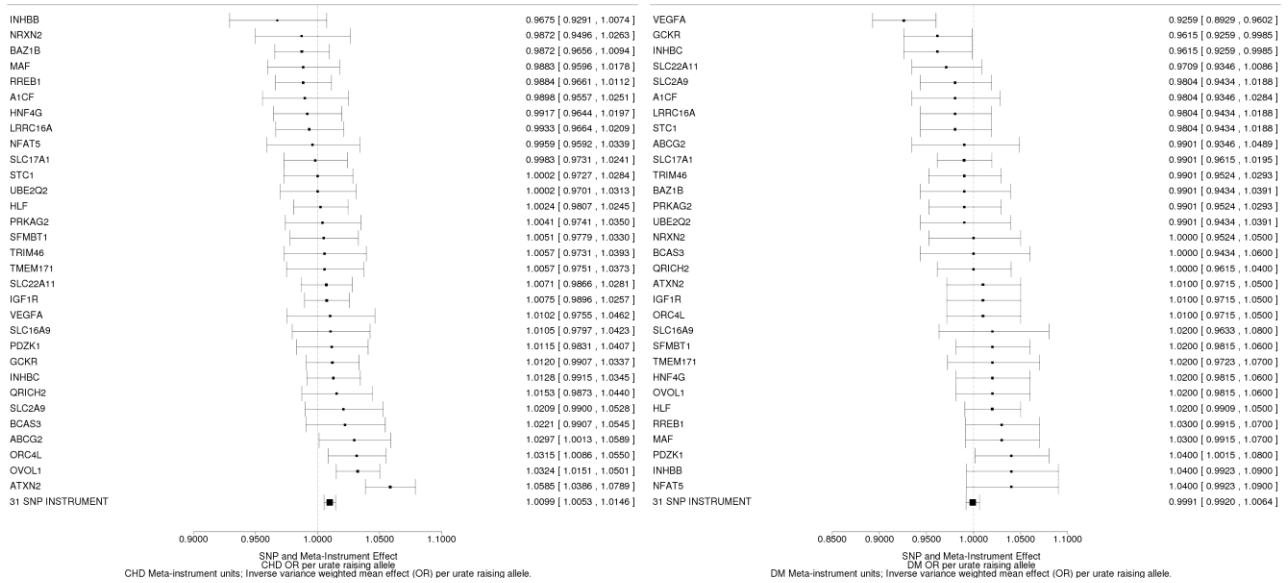

Figure S7. The association of the individual SNPs and the 31 SNP instrument for plasma urate concentration with binary phenotypes. (Error bars are 95%CI, SNP order is by magnitude of effect within a phenotype, and all effects are with respect to the urate raising allele). Significant association in the 31 SNP instrument is indicative of pleiotropy.

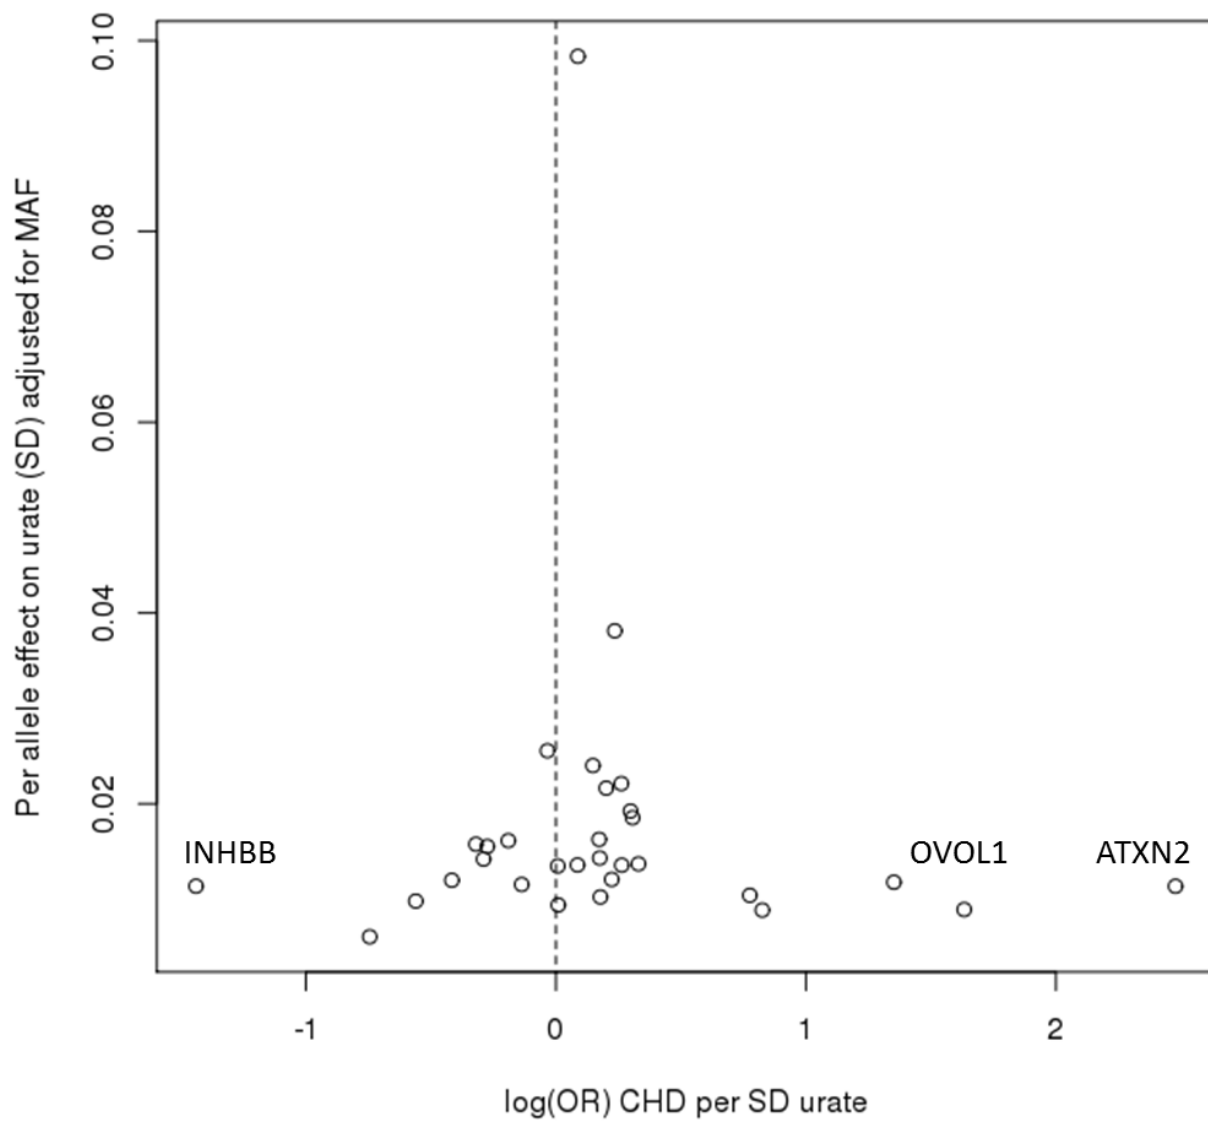

Figure S8. Funnel plot of individual IV beta estimates for SNPs in the instrument. The distribution about the point estimate is asymmetric suggesting there is an unmeasured net pleiotropic effect on the instrument. (Egger test for funnel plot symmetry P.value = 0.011).

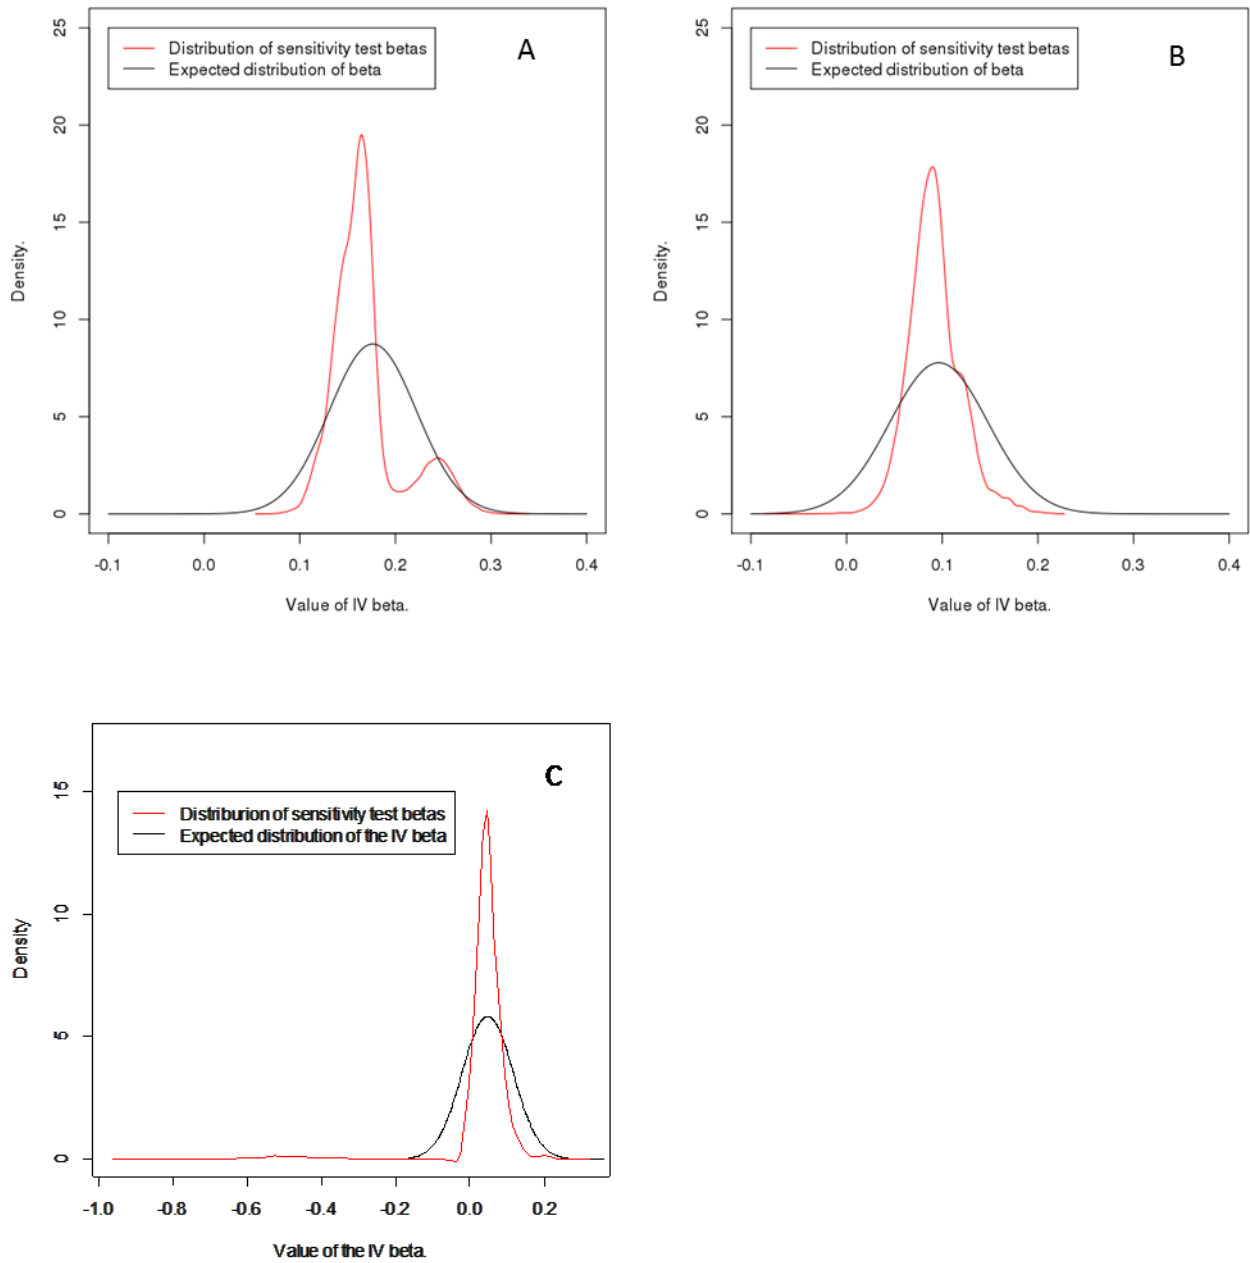

Figure S9. Sensitivity tests. The assumed normal distribution (black) of the point estimate of the IV beta using the 31 SNP instrument with (B) and without (A) covariates. Similar for MR Egger regression(C). In each case the red curve is the empirical distribution of the IV beta estimated in 100 000 25 SNP instruments obtained by repeatedly excluding 6 SNPs at random.

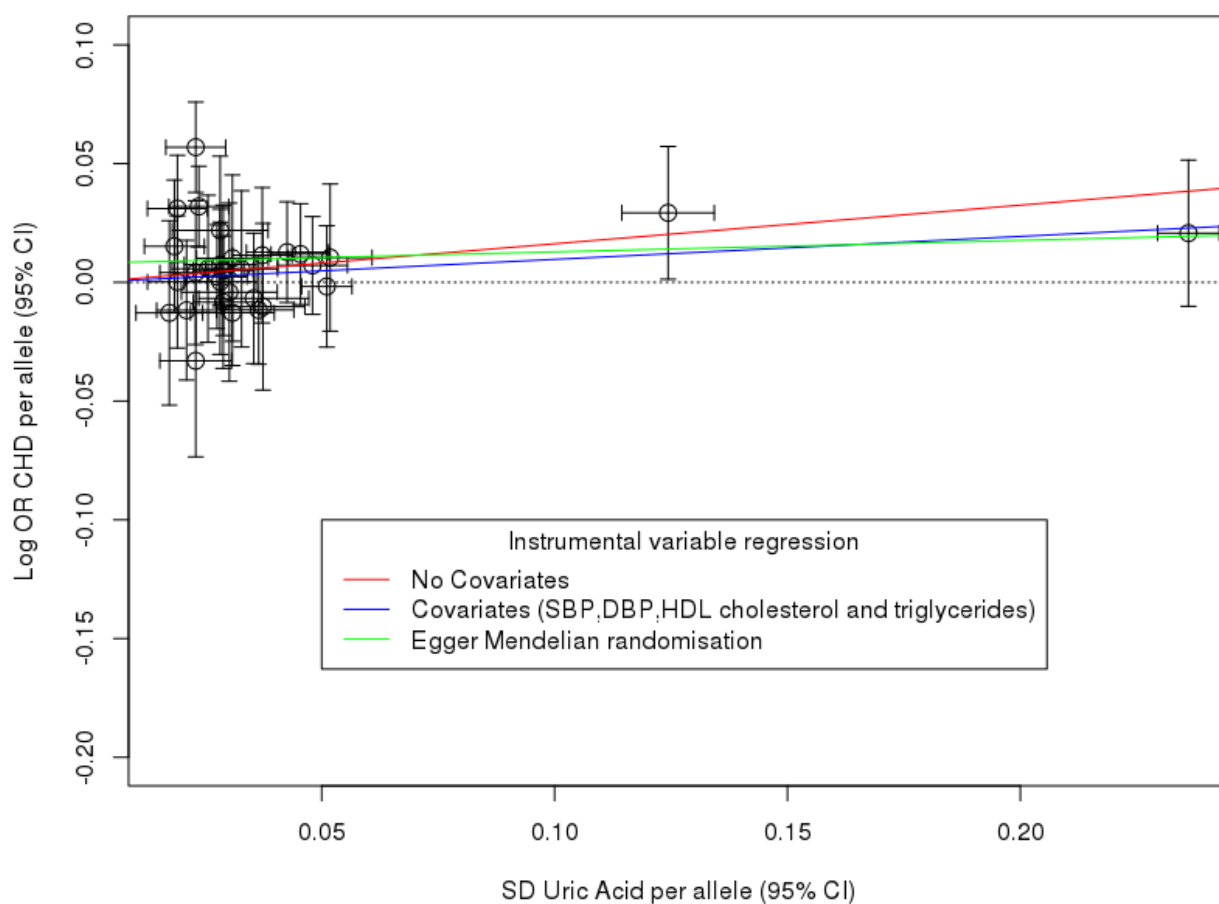

Figure S10. Association of SNPs with plasma urate concentration and risk of coronary heart disease. Effect estimates are as figure 2 in the main paper except that in this figure all effect estimates have been adjusted to be relative to the urate raising allele of the SNP. This allows the Egger Mendelian randomisation to be represented in the same figure. Error bars are 95% CI in each dimension.

Ehret GB, Munroe PB, Rice KM, Bochud M, Johnson AD, Chasman DI, Smith AV, Tobin MD, Verwoert GC, Hwang SJ, Pihur V, Vollenweider P, O'Reilly PF, Amin N, Bragg-Gresham JL, Teumer A, Glazer NL, Launer L, Zhao JH, Aulchenko Y, Heath S, Söber S, Parsa A, Luan J, Arora P, Dehghan A, Zhang F, Lucas G, Hicks AA, Jackson AU, Peden JF, Tanaka T, Wild SH, Rudan I, Igl W, Milaneschi Y, Parker AN, Fava C, Chambers JC, Fox ER, Kumari M, Go MJ, van der Harst P, Kao WH, Sjögren M, Vinay DG, Alexander M, Tabara Y, Shaw-Hawkins S, Whincup PH, Liu Y, Shi G, Kuusisto J, Tayo B, Seielstad M, Sim X, Nguyen KD, Lehtimäki T, Matullo G, Wu Y, Gaunt TR, Onland-Moret NC, Cooper MN, Platou CG, Org E, Hardy R, Dahgam S, Palmen J, Vitart V, Braund PS, Kuznetsova T, Uiterwaal CS, Adeyemo A, Palmas W, Campbell H, Ludwig B, Tomaszewski M, Tzoulaki I, Palmer ND, CARDIoGRAM consortium, CKDGen Consortium, KidneyGen Consortium, EchoGen consortium, CHARGE-HF consortium, Aspelund T, Garcia M, Chang YP, O'Connell JR, Steinle NI, Grobbee DE, Arking DE, Kardia SL, Morrison AC, Hernandez D, Najjar S, McArdle WL, Hadley D, Brown MJ, Connell JM, Hingorani AD, Day IN, Lawlor DA, Beilby JP, Lawrence RW, Clarke R, Hopewell JC, Ongen H, Dreisbach AW, Li Y, Young JH, Bis JC, Kähönen M, Viikari J, Adair LS, Lee NR, Chen MH, Olden M, Pattaro C, Bolton JA, Köttgen A, Bergmann S, Mooser V, Chaturvedi N, Frayling TM, Islam M, Jafar TH, Erdmann J, Kulkarni SR, Bornstein SR, Grässler J, Groop L, Voight BF, Kettunen J, Howard P, Taylor A, Guarrera S, Ricceri F, Emilsson V, Plump A, Barroso I, Khaw KT, Weder AB, Hunt SC, Sun YV, Bergman RN, Collins FS, Bonnycastle LL, Scott LJ, Stringham HM, Peltonen L, Perola M, Vartiainen E, Brand SM, Staessen JA, Wang TJ, Burton PR, Soler Artigas M, Dong Y, Snieder H, Wang X, Zhu H, Lohman KK, Rudock ME, Heckbert SR, Smith NL, Wiggins KL, Dumathey A, Shriner D, Veldre G, Viigimaa M, Kinra S, Prabhakaran D, Tripathy V, Langefeld CD, Rosengren A, Thelle DS, Corsi AM, Singleton A, Forrester T, Hilton G, McKenzie CA, Salako T, Iwai N, Kita Y, Ogiwara T, Ohkubo T, Okamura T, Ueshima H, Umemura S, Eyheramendy S, Meitinger T, Wichmann HE, Cho YS, Kim HL, Lee JY, Scott J, Sehmi JS, Zhang W, Hedblad B, Nilsson P, Smith GD, Wong A, Narisu N, Stančáková A, Raffel LJ, Yao J, Kathiresan S, O'Donnell CJ, Schwartz SM, Ikram MA, Longstreth WT Jr, Mosley TH, Seshadri S, Shrine NR, Wain LV, Morken MA, Swift AJ, Laitinen J, Prokopenko I, Zitting P, Cooper JA, Humphries SE, Danesh J, Rasheed A, Goel A, Hamsten A, Watkins H, Bakker SJ, van Gilst WH, Janipalli CS, Mani KR, Yajnik CS, Hofman A, Mattace-Raso FU, Oostra BA, Demirkan A, Isaacs A, Rivadeneira F, Lakatta EG, Orru M, Scuteri A, Ala-Korpela M, Kangas AJ, Lyytikäinen LP, Soininen P, Tukiainen T, Würtz P, Ong RT, Dörr M, Kroemer HK, Völker U, Völzke H, Galan P, Hercberg S, Lathrop M, Zelenika D, Deloukas P, Mangino M, Spector TD, Zhai G, Meschia JF, Nalls MA, Sharma P, Terzic J, Kumar MV, Denniff M, Zukowska-Szczechowska E, Wagenknecht LE, Fowkes FG, Charchar FJ, Schwarz PE, Hayward C, Guo X, Rotimi C, Bots ML, Brand E, Samani NJ, Polasek O, Talmud PJ, Nyberg F, Kuh D, Laan M, Hveem K, Palmer LJ, van der Schouw YT, Casas JP, Mohlke KL, Vineis P, Raitakari O, Ganesh SK, Wong TY, Tai ES, Cooper RS, Laakso M, Rao DC, Harris TB, Morris RW, Dominiczak AF, Kivimäki M, Marmot MG, Miki T, Saleheen D, Chandak GR, Coresh J, Navis G, Salomaa V, Han BG, Zhu X, Kooner JS, Melander O, Ridker PM, Bandinelli S, Gyllenstein UB, Wright AF, Wilson JF, Ferrucci L, Farrall M, Tuomilehto J, Pramstaller PP, Elosua R, Soranzo N, Sijbrands EJ, Altshuler D, Loos RJ, Shuldiner AR, Gieger C, Meneton P, Uitterlinden AG, Wareham NJ, Gudnason V, Rotter JI, Rettig R, Uda M, Strachan DP, Witteman JC, Hartikainen AL, Beckmann JS, Boerwinkle E, Vasan RS, Boehnke M, Larson MG, Järvelin MR, Psaty BM, Abecasis GR, Chakravarti A, Elliott P, van Duijn CM, Newton-Cheh C, Levy D, Caulfield MJ, Johnson T.

## Supplementary References

- s1 Liese AD, Hense HW, Lowel H, et al. (1999) Association of serum uric acid with all-cause and cardiovascular disease mortality and incident myocardial infarction in the MONICA Augsburg cohort. *World Health Organization Monitoring Trends and Determinants in Cardiovascular Diseases. Epidemiology* 10: 391–397.
- s2 Puddu PE, Lanti M, Menotti A, et al. (2001) Serum uric acid for short-term prediction of cardiovascular disease incidence in the Gubbio population study. *Acta Cardiol* 56: 243–251.
- s3 Fang J, Alderman MH, (2000) Serum uric acid and cardiovascular mortality the NHANES I epidemiological follow-up study, 1971–1992. *National Health and Nutrition Examination Survey. JAMA* 283: 2404–2410.
- s4 Medalie JH, Kahn HA, Neufeld HN, Riss E, and Goldbourt U (1973) Five-year myocardial infarction incidence. II. Association of single variables to age and birthplace. *J Chronic Dis* 26: 325–349.
- s5 Moriarty JT, Folsom AR, Iribarren C, Nieto FJ, and Rosamond WD, (2000) Serum uric acid and risk of coronary heart disease: Atherosclerosis Risk in Communities (ARIC) Study. *Ann Epidemiol* 10: 136–143.
- s6 Shah T, Engmann J, Dale C, et al. (2013) Population Genomics of Cardiometabolic Traits: Design of the University College London-London School of Hygiene and Tropical Medicine-Edinburgh-Bristol (UCLEB) Consortium. *PLoS ONE* 8(8): e71345. doi:10.1371/journal.pone.0071345
- s7 Tomita M, Mizuno S, Yamanaka H, et al. (2000) Does hyperuricemia affect mortality? A prospective cohort study of Japanese male workers. *J Epidemiol* 10: 403–409.
- s8 Köttgen A, Albrecht E, Teumer A, et al. (2013). Genome-wide association analyses identify 18 new loci associated with serum urate concentrations. *Nature genetics*;45(2):145–54
- s9 Kolz M, Johnson T, Sanna S, et al. (2009). Meta-analysis of 28,141 individuals identifies common variants within five new loci that influence uric acid concentrations. *PLoS Genetics*; Jun;5(6):e1000504
- s10 Schunkert H, König IR, Kathiresan S, et al. (2011) Large-scale association analysis identifies 13 new susceptibility loci for coronary artery disease. *Nat Genet.* 43: 333–338
- s11 Coronary Artery Disease (C4D) Genetics Consortium (Writing Committee: Peden JF, Hopewell JC, Saleheen D, et al.). (2011). A genome-wide association study in Europeans and South Asians identifies five new loci for coronary artery disease. *Nat Genet.* 43: 339–344
- s12 CARDIoGRAMplusC4D Consortium, Deloukas P, Kanoni S, Willenborg C, et al. (2013). Large-scale association analysis identifies new risk loci for coronary artery disease. *Nat Genet* 45:25–33
- s13 Global Lipids Genetics Consortium 2013. Discovery and refinement of loci associated with lipid levels *Nature Genetics* 45, 1274–1283.
- S14 Morris AP, Voight BF, Teslovich TM, et al. DIAbetes Genetics Replication And Meta-analysis (DIAGRAM) Consortium. (2012) Large-scale association analysis provides insights into the genetic architecture and pathophysiology of type 2 diabetes. *Nat Genet.* 44:981–90
- s15 Dupuis J, Langenberg C, Prokopenko I, et al. (2010) New genetic loci implicated in fasting glucose homeostasis and their impact on type 2 diabetes risk. *Nature Genetics.* 42. 105–116.
- s16 ICBP, Ehret GB, Munroe PB, Rice KM, et al. (2011). Genetic variants in novel pathways influence blood pressure and cardiovascular disease risk. *Nature.* 478. 103–109.



- s17 Speliotes EK, Willer CJ, Berndt SI, et al. (2010). Association analyses of 249,796 individuals reveal 18 new loci associated with body mass index. *Nat Genet* 42, 937-948.
- s18 Wheeler, JG, Juzwishin, DM, Eriksdottir, G, Gudnason, V, and Danesh J, (2005) Serum Uric Acid and Coronary Heart Disease in 9458 Incident Cases and 155084 Controls: Prospective Study and Meta-Analysis. *PLoS Med.* 2: 236–243.
- s19 Yang Q, Köttgen A, Dehghan A, et al. 2010. Multiple Genetic Loci Influence Serum Urate and Their Relationship with Gout and Cardiovascular Disease Risk Factors *Circ Cardiovasc Genet.* 3(6): 523–530.
- s20 ICBP, Ehret GB, Munroe PB, Rice KM, et al. (2011). Genetic variants in novel pathways influence blood pressure and cardiovascular disease risk. *Nature.* 478. 103–109.
